# Supplementary material for: Microsatellites from Fosterella christophii (Bromeliaceae) by de novo transcriptome sequencing on the Pacific Biosciences RS platform
Source: PubMed Central journal article supplement — Appl Plant Sci. 2016 Jan 7;4(1):apps.1500084. doi: 10.3732/apps.1500084 (PMC4716777; doi:10.3732/apps.1500084), 2016-01-07

APPENDIX S2. Principal coordinate analyses (PCoA) based on microsatellite data at 13 loci and across 81 *Fosterella* accessions, including 29 accessions of *F. christophii*, 31 of *F. micrantha*, and 21 of *F. villosula*. Each species is represented by a unique symbol. Seven identical multilocus genotypes were identified. The first three axes together represent 53.5% of the total genetic variation (Dim-1 = 22.7%, Dim-2 = 18.7%, Dim-3 = 11.8%). Three distinct groups (indicated by dotted lines) could be discerned, illustrating the potential of the newly developed microsatellite markers for species delimitation.

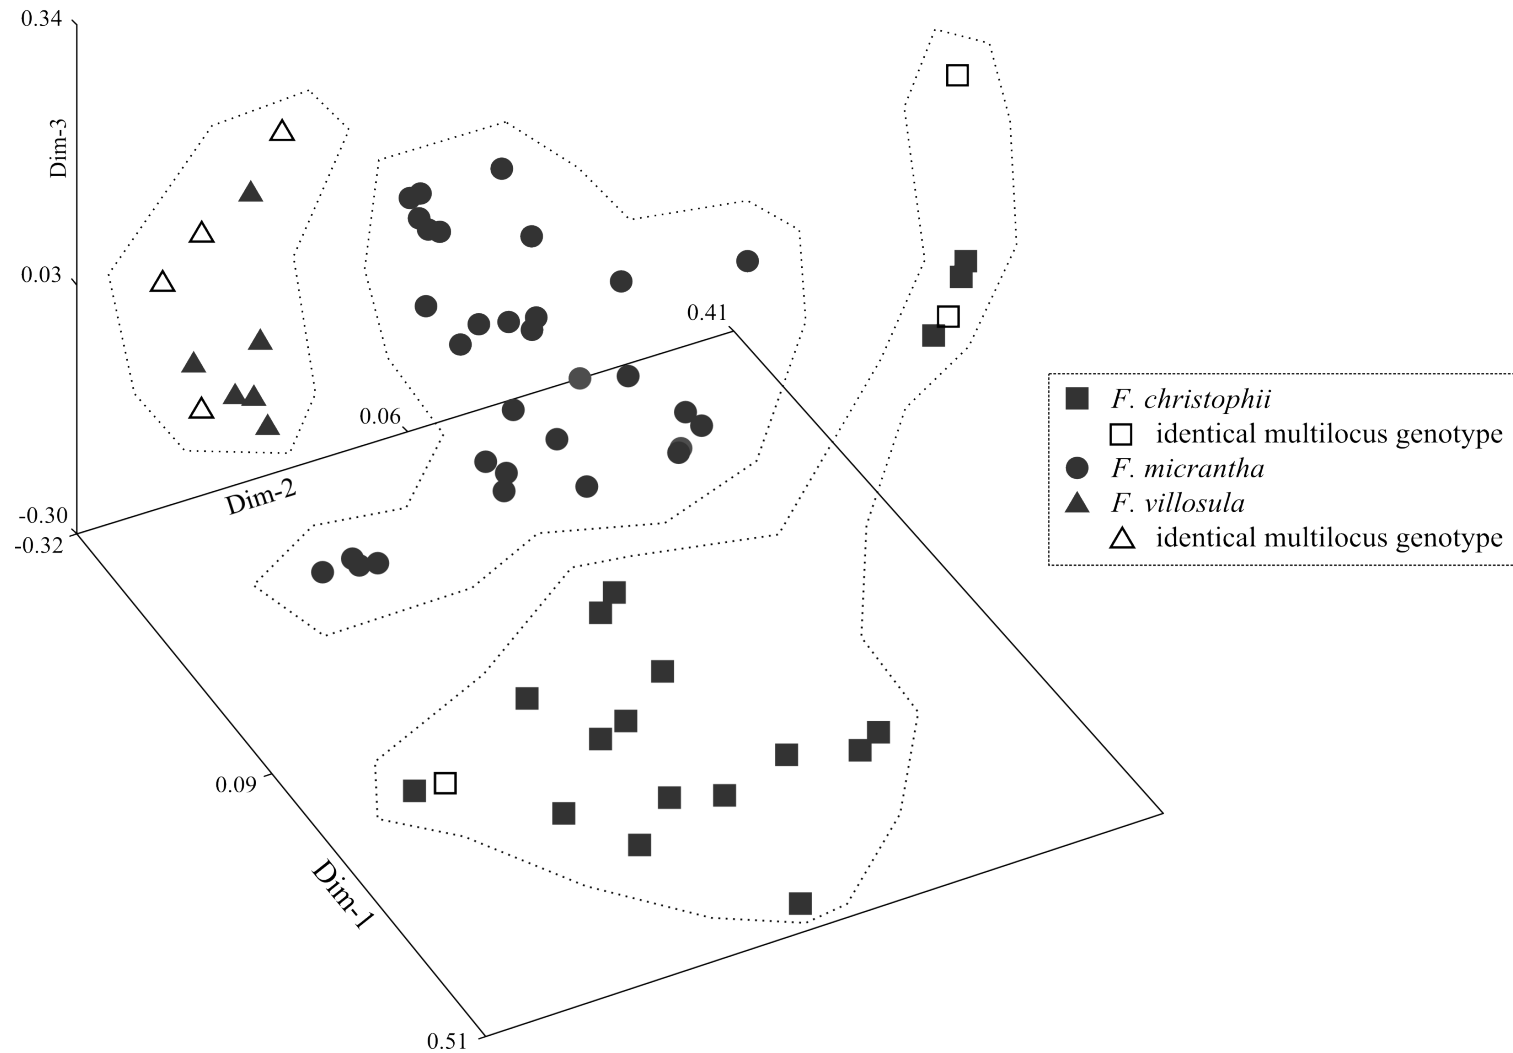

Supplement: apps.1500084_s2.pdf [file apps.1500084_s2.pdf]
